# Supplementary material for: Synthesis, crystal structure and in silico studies of novel 2,4-dimethoxy-tetrahydropyrimido[4,5-b]quinolin-6(7H)-ones
Source: Royal Society of Chemistry journal article supplement (doi:10.1039/d2ra02694e), 2022-01-01
Supplement: d2ra02694e1.pdf [file d2ra02694e1.pdf]

## Supporting Information

### Synthesis, crystal structure, *in silico* studies of novel 2,4-dimethoxy-tetrahydropyrimido[4,5-b]quinolin-6(7H)-ones

Subham G. Patel,<sup>a</sup> Raturajsinh M. Vala,<sup>a</sup> Paras J. Patel,<sup>a</sup> Dipti B. Upadhyay,<sup>a</sup> V. Ramkumar,<sup>b</sup> Ramesh L. Gardas,<sup>b</sup> and Hitendra M. Patel<sup>a\*</sup>

<sup>a</sup> Department of Chemistry, Sardar Patel University, Vallabh Vidyanagar, 388120, Gujarat, India

<sup>b</sup> Department of Chemistry, Indian Institute of Technology, Madras, India.

\* Corresponding Author: Hitendra M. Patel, E-mail: [hm\\_patel@spuvvn.edu](mailto:hm_patel@spuvvn.edu).

#### Table of Contents

| Sr. No. | Content                                                                                                                                                                              | Page No. |
|---------|--------------------------------------------------------------------------------------------------------------------------------------------------------------------------------------|----------|
| 1       | Comparisons of computed geometrical parameters of <b>4a</b> using various basis sets in the gaseous phase with the corresponding experimental ones.                                  | S2-S3    |
| 2       | Comparisons of computed geometrical parameters of <b>4b</b> , <b>4c</b> and <b>4d</b> using B3LYP/6-31G(d) basis sets in the gaseous phase with the corresponding experimental ones. | S4-S5    |
| 3       | Single-crystal X-ray diffraction data of compound <b>4(a-d)</b>                                                                                                                      | S6-S13   |
| 4       | Optimised structure of Molecule <b>4(a-d)</b> using DFT                                                                                                                              | S14      |

**Table S1.** Comparisons of computed geometrical parameters of **4a** using various basis sets in the gaseous phase with the corresponding experimental ones.

| Structural<br>Parameter    | B3LYP  |               |                 |            |                    |                    |                     | X-ray data |
|----------------------------|--------|---------------|-----------------|------------|--------------------|--------------------|---------------------|------------|
|                            | 6-31G  | 6-31G(d)      | 6-31G<br>(d, p) | 6-<br>311G | 6-311G+<br>(2d, p) | 6-311G++<br>(d, p) | 6-311G++<br>(d, 2p) |            |
| <b>Bond length(Å)</b>      |        |               |                 |            |                    |                    |                     |            |
| C3-C20                     | 1.544  | 1.538         | 1.538           | 1.542      | 1.532              | 1.537              | 1.538               | 1.532      |
| C3-C21                     | 1.548  | 1.543         | 1.542           | 1.546      | 1.539              | 1.541              | 1.542               | 1.539      |
| C3-C4                      | 1.548  | 1.542         | 1.542           | 1.548      | 1.539              | 1.541              | 1.541               | 1.528      |
| C4-C5                      | 1.523  | 1.527         | 1.527           | 1.519      | 1.522              | 1.525              | 1.525               | 1.5        |
| C5-O1                      | 1.257  | 1.229         | 1.229           | 1.256      | 1.225              | 1.225              | 1.226               | 1.197      |
| C5-C6                      | 1.459  | 1.465         | 1.465           | 1.457      | 1.461              | 1.463              | 1.463               | 1.488      |
| C6-C7                      | 1.53   | 1.526         | 1.526           | 1.53       | 1.524              | 1.526              | 1.527               | 1.509      |
| C6-C1                      | 1.367  | 1.362         | 1.362           | 1.364      | 1.356              | 1.36               | 1.359               | 1.318      |
| C7-C12                     | 1.541  | 1.537         | 1.537           | 1.541      | 1.535              | 1.535              | 1.536               | 1.537      |
| C7-C8                      | 1.517  | 1.516         | 1.516           | 1.516      | 1.514              | 1.514              | 1.514               | 1.517      |
| C8-C9                      | 1.403  | 1.402         | 1.402           | 1.4        | 1.398              | 1.401              | 1.401               | 1.386      |
| C8-C11                     | 1.402  | 1.396         | 1.396           | 1.398      | 1.391              | 1.393              | 1.393               | 1.392      |
| C9-O2                      | 1.362  | 1.341         | 1.342           | 1.362      | 1.339              | 1.339              | 1.338               | 1.325      |
| O2-C18                     | 1.466  | 1.433         | 1.433           | 1.466      | 1.435              | 1.436              | 1.437               | 1.443      |
| C9-N2                      | 1.347  | 1.336         | 1.336           | 1.347      | 1.332              | 1.334              | 1.333               | 1.351      |
| N2-C10                     | 1.349  | 1.337         | 1.338           | 1.348      | 1.333              | 1.335              | 1.335               | 1.315      |
| C10-O3                     | 1.361  | 1.342         | 1.343           | 1.361      | 1.34               | 1.341              | 1.342               | 1.365      |
| O3-C19                     | 1.464  | 1.43          | 1.43            | 1.464      | 1.432              | 1.433              | 1.434               | 1.427      |
| C10-N3                     | 1.34   | 1.331         | 1.331           | 1.34       | 1.326              | 1.327              | 1.327               | 1.32       |
| N3-C11                     | 1.352  | 1.341         | 1.34            | 1.353      | 1.336              | 1.337              | 1.337               | 1.356      |
| C11-N1                     | 1.387  | 1.386         | 1.387           | 1.387      | 1.385              | 1.387              | 1.387               | 1.361      |
| N1-C1                      | 1.386  | 1.38          | 1.38            | 1.387      | 1.379              | 1.38               | 1.38                | 1.389      |
| C1-C2                      | 1.51   | 1.508         | 1.508           | 1.509      | 1.504              | 1.506              | 1.506               | 1.505      |
| C2-C3                      | 1.551  | 1.545         | 1.545           | 1.551      | 1.542              | 1.543              | 1.543               | 1.536      |
| C12-C13                    | 1.404  | 1.4           | 1.4             | 1.401      | 1.395              | 1.398              | 1.398               | 1.378      |
| C12-C17                    | 1.405  | 1.4           | 1.401           | 1.403      | 1.395              | 1.398              | 1.398               | 1.384      |
| C13-C14                    | 1.399  | 1.395         | 1.394           | 1.398      | 1.391              | 1.394              | 1.393               | 1.388      |
| C14-C15                    | 1.392  | 1.393         | 1.393           | 1.388      | 1.387              | 1.39               | 1.39                | 1.374      |
| C15-C11                    | 1.833  | 1.763         | 1.763           | 1.835      | 1.761              | 1.762              | 1.762               | 1.731      |
| C15-C16                    | 1.392  | 1.393         | 1.393           | 1.389      | 1.387              | 1.391              | 1.391               | 1.348      |
| C16-C17                    | 1.4    | 1.396         | 1.394           | 1.397      | 1.391              | 1.393              | 1.394               | 1.395      |
| <b>R<sup>2</sup> value</b> | 0.9513 | <b>0.9715</b> | 0.9711          | 0.9507     | <b>0.9734</b>      | 0.972              | 0.9724              | 1          |
| <b>Bond angle (°)</b>      |        |               |                 |            |                    |                    |                     |            |
| C20-C3-C21                 | 109.05 | 109.02        | 109.02          | 109.1      | 109.01             | 109.02             | 108.96              | 108.9      |
| C21-C3-C4                  | 110.48 | 110.49        | 110.5           | 110.41     | 110.43             | 110.44             | 110.46              | 110.5      |
| C3-C4-C5                   | 114.2  | 114.64        | 114.7           | 114.28     | 114.97             | 114.92             | 114.87              | 114.65     |
| C4-C5-O1                   | 120.08 | 120.35        | 120.32          | 120.07     | 120.2              | 120.23             | 120.31              | 121.02     |
| C4-C5-C6                   | 118.41 | 117.84        | 117.8           | 118.49     | 118.07             | 117.91             | 117.89              | 116.92     |
| C5-C6-C7                   | 117.93 | 118.07        | 118.1           | 118.23     | 118.53             | 118.54             | 118.51              | 115.53     |
| C5-C6-C1                   | 119.99 | 119.95        | 119.97          | 119.94     | 119.76             | 119.85             | 119.87              | 120.68     |
| C7-C6-C1                   | 122.08 | 121.98        | 121.92          | 121.84     | 121.7              | 121.6              | 121.62              | 123.78     |

|                            |        |               |              |        |        |        |        |        |
|----------------------------|--------|---------------|--------------|--------|--------|--------|--------|--------|
| C6-C7-C12                  | 111.12 | 111.07        | 111.08       | 111.13 | 111.15 | 111.03 | 110.98 | 110.15 |
| C6-C7-C8                   | 109.87 | 109.57        | 109.55       | 109.9  | 109.56 | 109.49 | 109.51 | 109.61 |
| C7-C8-C9                   | 123.91 | 124.28        | 124.32       | 123.99 | 124.52 | 124.51 | 124.52 | 121.91 |
| C7-C8-C11                  | 122.04 | 122.21        | 122.18       | 121.72 | 121.86 | 121.9  | 121.9  | 122.21 |
| C9-C8-C11                  | 114.02 | 113.49        | 113.48       | 114.26 | 113.6  | 113.56 | 113.56 | 115.72 |
| C8-C9-N2                   | 123.33 | 123.6         | 123.62       | 123.12 | 123.42 | 123.38 | 123.41 | 122.95 |
| C8-C9-O2                   | 117.55 | 117.07        | 117.1        | 117.56 | 117.16 | 117.23 | 117.22 | 118.28 |
| C9-O2-C18                  | 118.46 | 117.9         | 117.89       | 118.73 | 118.19 | 118.38 | 118.4  | 118.18 |
| C9-N2-C10                  | 116.61 | 115.94        | 115.9        | 116.77 | 116.18 | 116.21 | 116.19 | 114.23 |
| C10-O3-C19                 | 118.06 | 117.66        | 117.64       | 118.34 | 117.95 | 118.16 | 118.1  | 116.53 |
| N2-C10-N3                  | 126.06 | 127.29        | 127.29       | 125.97 | 126.95 | 126.98 | 127    | 130.38 |
| C10-N3-C11                 | 115.49 | 114.6         | 114.62       | 115.42 | 114.9  | 114.88 | 114.85 | 113.68 |
| N3-C11-C8                  | 124.46 | 125.06        | 125.07       | 124.42 | 124.89 | 124.95 | 124.95 | 123.01 |
| C8-C11-N1                  | 119.4  | 119.01        | 118.99       | 119.4  | 118.98 | 118.94 | 118.94 | 120.79 |
| C11-N1-C1                  | 122.14 | 121.91        | 121.88       | 122.01 | 121.64 | 121.65 | 121.69 | 120.58 |
| N1-C1-C6                   | 120.59 | 120.64        | 120.66       | 120.44 | 120.59 | 120.56 | 120.61 | 122.21 |
| C6-C1-C2                   | 123.62 | 123.77        | 123.76       | 123.74 | 123.96 | 123.87 | 123.89 | 123.6  |
| C1-C2-C3                   | 113.16 | 113.45        | 113.45       | 113.3  | 113.72 | 113.64 | 113.57 | 113.1  |
| C2-C3-C4                   | 107.71 | 107.65        | 107.62       | 107.74 | 107.71 | 107.69 | 107.73 | 108    |
| C7-C12-C13                 | 120.09 | 120.21        | 120.18       | 119.99 | 120.1  | 120.04 | 120.09 | 121.96 |
| C12-C13-C14                | 120.96 | 121.15        | 121.21       | 120.97 | 121.21 | 121.18 | 121.18 | 120.32 |
| C13-C14-C15                | 118.77 | 119.19        | 119.14       | 118.74 | 119.18 | 119.19 | 119.19 | 119.69 |
| C14-C15-C11                | 119.13 | 119.59        | 119.54       | 119.09 | 119.59 | 119.58 | 119.59 | 119.22 |
| C14-C15-C16                | 121.91 | 120.96        | 120.98       | 122    | 120.96 | 120.58 | 120.97 | 120.57 |
| C15-C16-C17                | 118.58 | 119.05        | 119.07       | 118.53 | 119.07 | 119.03 | 119.05 | 120.46 |
| C16-C17-C12                | 121.09 | 121.27        | 121.28       | 121.15 | 121.31 | 121.34 | 121.27 | 119.7  |
| C17-C12-C13                | 118.69 | 118.38        | 118.31       | 118.61 | 118.28 | 118.29 | 118.34 | 119.2  |
| <b>R<sup>2</sup> value</b> | 0.9149 | <b>0.9279</b> | <b>0.927</b> | 0.908  | 0.9165 | 0.9156 | 0.9174 | 1      |

**Table S2.** Comparisons of computed geometrical parameters of **4b**, **4c** and **4d** using B3LYP/6-31G(d) basis sets in the gaseous phase with the corresponding experimental ones.

| Structural Parameter       | B3LYP/6-31G(d) | X-ray data of <b>4b</b> | Structural Parameter | B3LYP/6-31G(d) | X-ray data of <b>4c</b> | Structural Parameter | B3LYP/6-31G(d) | X-ray data of <b>4d</b> |
|----------------------------|----------------|-------------------------|----------------------|----------------|-------------------------|----------------------|----------------|-------------------------|
| <b>Bond length(Å)</b>      |                |                         |                      |                |                         |                      |                |                         |
| C3-C13                     | 1.542          | 1.519                   | C1-C2                | 1.547          | 1.532                   | C3-C12               | 1.542          | 1.523                   |
| C3-C12                     | 1.537          | 1.528                   | C2-C12               | 1.542          | 1.526                   | C3-C13               | 1.538          | 1.527                   |
| C3-C4                      | 1.543          | 1.528                   | C2-C13               | 1.537          | 1.522                   | C3-C4                | 1.542          | 1.525                   |
| C4-C5                      | 1.528          | 1.5                     | C2-C3                | 1.544          | 1.525                   | C4-C5                | 1.528          | 1.503                   |
| C5-O1                      | 1.23           | 1.231                   | C3-C4                | 1.527          | 1.502                   | C5-O1                | 1.229          | 1.233                   |
| C5-C6                      | 1.465          | 1.447                   | C4-O1                | 1.229          | 1.234                   | C5-C6                | 1.464          | 1.446                   |
| C6-C7                      | 1.525          | 1.52                    | C4-C5                | 1.466          | 1.445                   | C6-C7                | 1.525          | 1.519                   |
| C6-C1                      | 1.361          | 1.351                   | C5-C11               | 1.362          | 1.357                   | C6-C1                | 1.362          | 1.357                   |
| C7-C14                     | 1.537          | 1.532                   | C5-C6                | 1.527          | 1.523                   | C7-C14               | 1.537          | 1.529                   |
| C7-C8                      | 1.517          | 1.513                   | C6-C14               | 1.538          | 1.529                   | C7-C8                | 1.517          | 1.512                   |
| C8-C9                      | 1.403          | 1.395                   | C6-C7                | 1.516          | 1.515                   | C8-C9                | 1.403          | 1.392                   |
| C8-C11                     | 1.396          | 1.375                   | C7-C10               | 1.39           | 1.379                   | C8-C11               | 1.396          | 1.378                   |
| C9-O2                      | 1.342          | 1.347                   | C7-C8                | 1.408          | 1.392                   | C9-O2                | 1.341          | 1.347                   |
| O2-C20                     | 1.432          | 1.436                   | C8-O2                | 1.34           | 1.35                    | O2-C20               | 1.432          | 1.438                   |
| C9-N2                      | 1.336          | 1.326                   | O2-C20               | 1.434          | 1.434                   | C9-N2                | 1.336          | 1.329                   |
| N2-C10                     | 1.337          | 1.338                   | C8-N3                | 1.331          | 1.326                   | N2-C10               | 1.338          | 1.339                   |
| C10-O3                     | 1.343          | 1.345                   | N3-C9                | 1.339          | 1.336                   | C10-O3               | 1.343          | 1.348                   |
| O3-C21                     | 1.429          | 1.433                   | C9-O1                | 1.344          | 1.347                   | O3-C21               | 1.43           | 1.434                   |
| C10-N3                     | 1.331          | 1.313                   | O1-C21               | 1.429          | 1.442                   | C10-N3               | 1.331          | 1.313                   |
| N3-C11                     | 1.341          | 1.352                   | C9-N2                | 1.329          | 1.32                    | N3-C11               | 1.34           | 1.351                   |
| C11-N1                     | 1.387          | 1.373                   | N2-C10               | 1.348          | 1.35                    | C11-N1               | 1.386          | 1.373                   |
| N1-C1                      | 1.382          | 1.367                   | C10-N1               | 1.387          | 1.376                   | N1-C1                | 1.381          | 1.371                   |
| C1-C2                      | 1.508          | 1.497                   | N1-C11               | 1.382          | 1.368                   | C1-C2                | 1.509          | 1.496                   |
| C2-C3                      | 1.545          | 1.521                   | C11-C1               | 1.509          | 1.501                   | C2-C3                | 1.545          | 1.528                   |
| C14-C15                    | 1.401          | 1.379                   | C14-C15              | 1.394          | 1.383                   | C14-C15              | 1.4            | 1.386                   |
| C14-C19                    | 1.401          | 1.381                   | C15-C16              | 1.401          | 1.387                   | C15-C16              | 1.393          | 1.38                    |
| C15-C16                    | 1.395          | 1.39                    | C16-O3               | 1.369          | 1.374                   | C16-C11              | 1.763          | 1.745                   |
| C16-C17                    | 1.396          | 1.368                   | O3-C22               | 1.417          | 1.418                   | C16-C17              | 1.394          | 1.367                   |
| C17-C18                    | 1.396          | 1.364                   | C16-C17              | 1.4            | 1.378                   | C17-C18              | 1.395          | 1.372                   |
| C18-C19                    | 1.396          | 1.384                   | C17-C18              | 1.398          | 1.383                   | C18-C19              | 1.395          | 1.382                   |
| -                          | -              | -                       | C18-C19              | 1.391          | 1.377                   | C19-C14              | 1.4            | 1.385                   |
| -                          | -              | -                       | C19-C14              | 1.404          | 1.392                   | -                    | -              | -                       |
| <b>R<sup>2</sup> value</b> | <b>0.9827</b>  |                         |                      | <b>0.9881</b>  |                         |                      | <b>0.9916</b>  |                         |
| <b>Bond angle (°)</b>      |                |                         |                      |                |                         |                      |                |                         |
| C12-C3-C13                 | 109.04         | 109.27                  | C1-C2-C3             | 107.79         | 107.23                  | C12-C3-C13           | 108.98         | 108.99                  |
| C13-C3-C4                  | 110.45         | 110.42                  | C1-C2-C12            | 110.79         | 110.31                  | C12-C3-C4            | 110.51         | 110.44                  |
| C3-C4-C5                   | 114.65         | 116.2                   | C12-C2-C13           | 109.08         | 108.47                  | C3-C4-C5             | 114.63         | 115.79                  |
| C4-C5-O1                   | 120.25         | 119.65                  | C2-C3-C4             | 114.44         | 115.97                  | C4-C5-O1             | 120.4          | 119.94                  |
| C4-C5-C6                   | 117.87         | 118.94                  | C3-C4-O4             | 120.46         | 119.89                  | C4-C5-C6             | 117.81         | 118.73                  |
| C5-C6-C7                   | 118.11         | 118.84                  | C3-C4-C5             | 117.66         | 118.45                  | C5-C6-C7             | 117.94         | 118.48                  |
| C5-C6-C1                   | 119.91         | 118.89                  | C4-C5-C6             | 117.96         | 118.3                   | C5-C6-C1             | 120.04         | 119.37                  |
| C7-C6-C1                   | 121.98         | 122.27                  | C4-C5-C11            | 119.92         | 119.63                  | C7-C6-C1             | 122.02         | 122.14                  |
| C6-C7-C14                  | 111.16         | 111.19                  | C11-C5-C6            | 122.11         | 122.05                  | C6-C7-C14            | 111.12         | 111.08                  |
| C6-C7-C8                   | 109.57         | 109.51                  | C5-C6-C14            | 110.85         | 112.33                  | C6-C7-C8             | 109.71         | 109.42                  |
| C7-C8-C9                   | 124.34         | 124.26                  | C5-C6-C7             | 109.75         | 109.44                  | C7-C8-C9             | 124.24         | 124.13                  |
| C7-C8-C11                  | 122.2          | 121.79                  | C6-C7-C8             | 124.25         | 123.63                  | C7-C8-C11            | 122.23         | 121.65                  |
| C9-C8-C11                  | 113.43         | 113.86                  | C6-C7-C10            | 122.24         | 122.17                  | C9-C8-C11            | 113.5          | 114.09                  |
| C8-C9-O2                   | 117.08         | 116.45                  | C10-C7-C8            | 113.49         | 113.98                  | C8-C9-O2             | 117.05         | 116.39                  |
| C9-O2-C20                  | 117.87         | 117.67                  | C7-C8-O2             | 116.79         | 115.93                  | C9-O2-C20            | 117.95         | 117.19                  |
| C8-C9-N2                   | 123.64         | 124.48                  | C8-O2-C20            | 117.58         | 117.56                  | C8-C9-N2             | 123.59         | 124.47                  |
| C9-N2-C10                  | 115.92         | 114.39                  | C7-C8-N3             | 123.95         | 124.66                  | C9-N2-C10            | 115.9          | 114.16                  |
| C10-O3-C21                 | 117.57         | 116.47                  | C8-N3-C9             | 115.66         | 114.3                   | C10-O3-C21           | 117.62         | 116.78                  |
| N2-C10-N3                  | 127.32         | 128.49                  | C9-O1-C21            | 117.33         | 116.44                  | N2-C10-N3            | 127.34         | 128.72                  |

|                            |               |        |             |               |        |             |               |        |
|----------------------------|---------------|--------|-------------|---------------|--------|-------------|---------------|--------|
| C10-N3-C11                 | 114.55        | 114.2  | N3-C9-N2    | 127.39        | 128.5  | C10-N3-C11  | 114.59        | 114.24 |
| N3-C11-C8                  | 125.11        | 124.5  | C9-N2-C10   | 114.74        | 114.22 | N3-C11-C8   | 125.05        | 124.24 |
| C8-C11-N1                  | 119           | 120.5  | N2-C10-C7   | 124.75        | 124.26 | C8-C11-N1   | 119.02        | 120.33 |
| C11-N1-C1                  | 121.84        | 121.46 | C-C10-N1    | 119.4         | 120.36 | C11-N1-C1   | 121.92        | 121.48 |
| N1-C1-C6                   | 120.67        | 121.09 | C10-N1-C11  | 121.75        | 121.26 | N1-C1-C6    | 120.69        | 120.69 |
| C6-C1-C2                   | 123.85        | 123.82 | N1-C11-C5   | 120.63        | 121.53 | C6-C1-C2    | 123.71        | 123.61 |
| C1-C2-C3                   | 113.42        | 114.01 | C5-C11-C1   | 123.75        | 123.26 | C1-C2-C3    | 113.45        | 113.8  |
| C2-C3-C4                   | 107.63        | 107.22 | C11-C1-C2   | 113.38        | 113.61 | C2-C3-C4    | 107.67        | 107.76 |
| C14-C15-C16                | 120.69        | 120.61 | C14-C15-C16 | 120.94        | 121.2  | C14-C15-C16 | 119.66        | 119.87 |
| C15-C16-C17                | 120.3         | 120.32 | C15-C16-O3  | 115.44        | 115.33 | C15-C16-C11 | 119.16        | 119.39 |
| C16-C17-C18                | 119.48        | 119.68 | C16-O3-C22  | 118.06        | 118.04 | C15-C16-C17 | 121.72        | 121.51 |
| C17-C18-C19                | 120.11        | 120.21 | C15-C16-C17 | 119.95        | 120.42 | C16-C17-C18 | 118.39        | 118.91 |
| C18-C19-C14                | 120.84        | 121.01 | C16-C17-C18 | 118.89        | 118.34 | C17-C18-C19 | 120.6         | 120.53 |
| C19-C14-C15                | 118.58        | 118.15 | C17-C18-C19 | 121.25        | 121.67 | C18-C19-C14 | 120.63        | 120.67 |
| -                          | -             | -      | C18-C19-C14 | 119.91        | 120.13 | C19-C14-C15 | 119           | 118.49 |
| -                          | -             | -      | C19-14-C15  | 119.05        | 118.22 | -           | -             | -      |
| <b>R<sup>2</sup> value</b> | <b>0.9802</b> |        |             | <b>0.9795</b> |        |             | <b>0.9813</b> |        |

# Crystal X-ray report of compound 4a [CCDC: 2133239].

## checkCIF (basic structural check) running

---

Checking for embedded fcf data in CIF ...

Found embedded fcf data in CIF. Extracting fcf data from uploaded CIF, please wait . .

## checkCIF/PLATON (basic structural check)

---

Structure factors have been supplied for datablock(s) 101

THIS REPORT IS FOR GUIDANCE ONLY. IF USED AS PART OF A REVIEW PROCEDURE FOR PUBLICATION, IT SHOULD NOT REPLACE THE EXPERTISE OF AN EXPERIENCED CRYSTALLOGRAPHIC REFEREE.

No syntax errors found. [CIF dictionary](#)

Please wait while processing .... [Interpreting this report](#)

Structure factor report

## Datablock: 101

---

Bond precision: C-C = 0.0082 Å Wavelength=0.71073  
Cell: a=6.1119(17) b=12.856(3) c=13.503(2)  
alpha=74.018(10) beta=83.479(15) gamma=76.619(15)

Temperature: 296 K

|                        | Calculated       | Reported         |
|------------------------|------------------|------------------|
| Volume                 | 990.9(4)         | 990.8(4)         |
| Space group            | P -1             | P -1             |
| Hall group             | -P 1             | -P 1             |
| Moiety formula         | C21 H22 Cl N3 O3 | ?                |
| Sum formula            | C21 H22 Cl N3 O3 | C21 H22 Cl N3 O3 |
| Mr                     | 399.87           | 399.86           |
| Dx, g cm <sup>-3</sup> | 1.340            | 1.340            |
| Z                      | 2                | 2                |
| Mu (mm <sup>-1</sup> ) | 0.220            | 0.220            |
| F000                   | 420.0            | 420.0            |
| F000'                  | 420.47           |                  |
| h,k,lmax               | 7,15,16          | 7,15,16          |
| Nref                   | 3503             | 2395             |
| Tmin,Tmax              | 0.944,0.965      | 0.941,0.966      |
| Tmin'                  | 0.940            |                  |

Correction method= # Reported T Limits: Tmin=0.941 Tmax=0.966 AbsCorr = MULTI-SCAN

Data completeness= 0.684 Theta(max)= 24.997

R(reflections)= 0.0636( 1393) wR2(reflections)= 0.2058( 2395)

S = 1.083 Npar= 261

---

The following ALERTS were generated. Each ALERT has the format

**test-name\_ALERT\_alert-type\_alert-level.**

Click on the hyperlinks for more details of the test.

---

### **Alert level A**

PLAT029\_ALERT\_3\_A\_diffn\_measured\_fraction\_theta\_full value Low . 0.684 Why?

**Author Response: Even though crystal data was attempted to collected up to 0.78 \%**  
**resolution, the crystal (the largest available) still diffracted quite weakly at high angle.**

---

### **Alert level B**

PLAT911\_ALERT\_3\_B Missing FCF Refl Between Thmin & STh/L= 0.595 1109 Report

**Author Response: These reflections were probably affected by unexpected deviations in their**

---

intensities for symmetry equivalent measurements and omitted during initial data reduction.

### Alert level C

PLAT088\_ALERT\_3\_C Poor Data / Parameter Ratio ..... 9.18 Note  
PLAT340\_ALERT\_3\_C Low Bond Precision on C-C Bonds ..... 0.00816 Ang.  
PLAT905\_ALERT\_3\_C Negative K value in the Analysis of Variance ... -2.303 Report  
PLAT934\_ALERT\_3\_C Number of (Iobs-Icalc)/Sigma(W) > 10 Outliers .. 1 Check

### Alert level G

PLAT066\_ALERT\_1\_G Predicted and Reported Tmin&Tmax Range Identical ? Check  
PLAT793\_ALERT\_4\_G Model has Chirality at C7 (Centro SPGR) S Verify  
PLAT883\_ALERT\_1\_G No Info/Value for \_atom\_sites\_solution\_primary . Please Do !  
PLAT913\_ALERT\_3\_G Missing # of Very Strong Reflections in FCF .... 1 Note  
PLAT941\_ALERT\_3\_G Average HKL Measurement Multiplicity ..... 2.0 Low  
PLAT965\_ALERT\_2\_G The SHELXL WEIGHT Optimisation has not Converged Please Check  
PLAT967\_ALERT\_5\_G Note: Two-Theta Cutoff Value in Embedded .res .. 50.0 Degree  
PLAT978\_ALERT\_2\_G Number C-C Bonds with Positive Residual Density. 0 Info

1 **ALERT level A** = Most likely a serious problem - resolve or explain  
1 **ALERT level B** = A potentially serious problem, consider carefully  
4 **ALERT level C** = Check. Ensure it is not caused by an omission or oversight  
8 **ALERT level G** = General information/check it is not something unexpected

2 ALERT type 1 CIF construction/syntax error, inconsistent or missing data  
2 ALERT type 2 Indicator that the structure model may be wrong or deficient  
8 ALERT type 3 Indicator that the structure quality may be low  
1 ALERT type 4 Improvement, methodology, query or suggestion  
1 ALERT type 5 Informative message, check

It is advisable to attempt to resolve as many as possible of the alerts in all categories. Often the minor alerts point to easily fixed oversights, errors and omissions in your CIF or refinement strategy, so attention to these fine details can be worthwhile. In order to resolve some of the more serious problems it may be necessary to carry out additional measurements or structure refinements. However, the purpose of your study may justify the reported deviations and the more serious of these should normally be commented upon in the discussion or experimental section of a paper or in the "special\_details" fields of the CIF. checkCIF was carefully designed to identify outliers and unusual parameters, but every test has its limitations and alerts that are not important in a particular case may appear. Conversely, the absence of alerts does not guarantee there are no aspects of the results needing attention. It is up to the individual to critically assess their own results and, if necessary, seek expert advice.

### Publication of your CIF in IUCr journals

A basic structural check has been run on your CIF. These basic checks will be run on all CIFs submitted for publication in IUCr journals (*Acta Crystallographica*, *Journal of Applied Crystallography*, *Journal of Synchrotron Radiation*); however, if you intend to submit to *Acta Crystallographica Section C* or *E* or *IUCrData*, you should make sure that full publication checks are run on the final version of your CIF prior to submission.

### Publication of your CIF in other journals

Please refer to the *Notes for Authors* of the relevant journal for any special instructions relating to CIF submission.

PLATON version of 19/02/2022; check.def file version of 19/02/2022

### Datablock 101 - ellipsoid plot

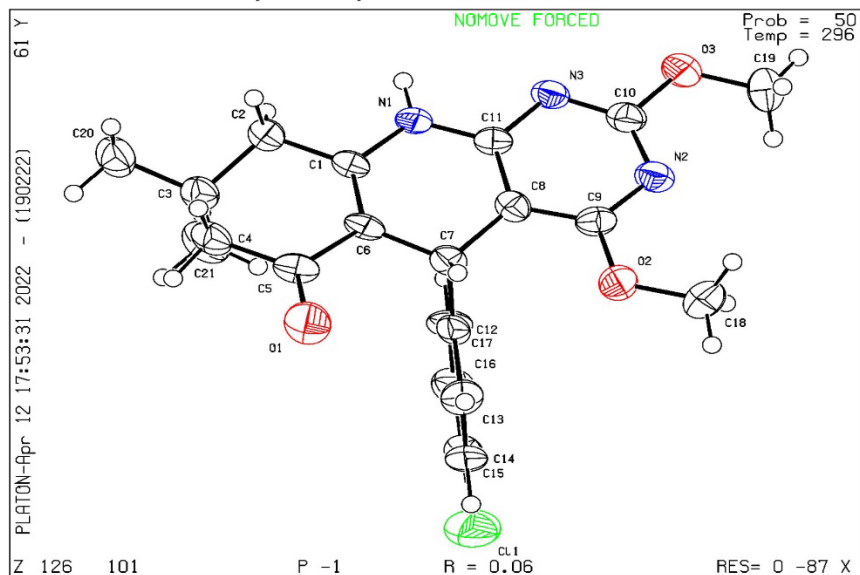

# Crystal X-ray report of compound **4b** [CCDC: 2149722].

## checkCIF (basic structural check) running

---

Checking for embedded fcf data in CIF ...

Found embedded fcf data in CIF. Extracting fcf data from uploaded CIF, please wait ...

## checkCIF/PLATON (basic structural check)

---

Structure factors have been supplied for datablock(s) 102

THIS REPORT IS FOR GUIDANCE ONLY. IF USED AS PART OF A REVIEW PROCEDURE FOR PUBLICATION, IT SHOULD NOT REPLACE THE EXPERTISE OF AN EXPERIENCED CRYSTALLOGRAPHIC REFEREE.

No syntax errors found. [CIF dictionary](#)

Please wait while processing .... [Interpreting this report](#)

Structure factor report

## Datablock: 102

---

Bond precision: C-C = 0.0023 Å Wavelength=0.71073  
Cell: a=11.3367(6) b=13.5799(7) c=13.0546(6)  
alpha=90 beta=108.872(2) gamma=90  
Temperature: 296 K

|                        | Calculated    | Reported      |
|------------------------|---------------|---------------|
| Volume                 | 1901.73(17)   | 1901.73(17)   |
| Space group            | P 21/n        | P 21/n        |
| Hall group             | -P 2yn        | -P 2yn        |
| Moiety formula         | C21 H23 N3 O3 | ?             |
| Sum formula            | C21 H23 N3 O3 | C21 H23 N3 O3 |
| Mr                     | 365.42        | 365.42        |
| Dx, g cm <sup>-3</sup> | 1.276         | 1.276         |
| Z                      | 4             | 4             |
| Mu (mm <sup>-1</sup> ) | 0.087         | 0.087         |
| F000                   | 776.0         | 776.0         |
| F000'                  | 776.33        |               |
| h,k,lmax               | 13,16,15      | 13,16,15      |
| Nref                   | 3353          | 3353          |
| Tmin,Tmax              | 0.977,0.986   | 0.976,0.986   |
| Tmin'                  | 0.976         |               |

Correction method= # Reported T Limits: Tmin=0.976 Tmax=0.986 AbsCorr = MULTI-SCAN

Data completeness= 1.000 Theta(max)= 25.000

R(reflections)= 0.0389( 2604) wR2(reflections)= 0.1134( 3353)

S = 1.556 Npar= 253

---

The following ALERTS were generated. Each ALERT has the format

**test-name\_ALERT\_alert-type\_alert-level.**

Click on the hyperlinks for more details of the test.

### **Alert level B**

PLAT230\_ALERT\_2\_B Hirshfeld Test Diff for C3 --C4 . 8.3 s.u.

**Author Response: This alarm is due to the elongated ADPs of carbon atoms which suggest that these are probably disordered.**

---

### **Alert level C**

PLAT230\_ALERT\_2\_C Hirshfeld Test Diff for C3 --C13 . 6.5 s.u.

**Author Response: This alarm is due to the elongated ADPs of carbon atoms which suggest that**



these are probably disordered.

PLAT230\_ALERT\_2\_C Hirshfeld Test Diff for C17 --C18 . 5.5 s.u.

**Author Response: This alarm is due to the elongated ADPs of carbon atoms which suggest that these are probably disordered.**

PLAT242\_ALERT\_2\_C Low 'MainMol' Ueq as Compared to Neighbors of C3 Check  
PLAT905\_ALERT\_3\_C Negative K value in the Analysis of Variance ... -0.299 Report

#### Alert level G

PLAT066\_ALERT\_1\_G Predicted and Reported Tmin&Tmax Range Identical ? Check  
PLAT793\_ALERT\_4\_G Model has Chirality at C7 (Centro SPGR) S Verify  
PLAT883\_ALERT\_1\_G No Info/Value for \_atom\_sites\_solution\_primary . Please Do !  
PLAT909\_ALERT\_3\_G Percentage of I>2sig(I) Data at Theta(Max) Still 50% Note  
PLAT941\_ALERT\_3\_G Average HKL Measurement Multiplicity ..... 4.7 Low  
PLAT965\_ALERT\_2\_G The SHELXL WEIGHT Optimisation has not Converged Please Check  
PLAT967\_ALERT\_5\_G Note: Two-Theta Cutoff Value in Embedded .res .. 50.0 Degree  
PLAT978\_ALERT\_2\_G Number C-C Bonds with Positive Residual Density. 3 Info

0 **ALERT level A** = Most likely a serious problem - resolve or explain  
1 **ALERT level B** = A potentially serious problem, consider carefully  
4 **ALERT level C** = Check. Ensure it is not caused by an omission or oversight  
8 **ALERT level G** = General information/check it is not something unexpected

2 ALERT type 1 CIF construction/syntax error, inconsistent or missing data  
6 ALERT type 2 Indicator that the structure model may be wrong or deficient  
3 ALERT type 3 Indicator that the structure quality may be low  
1 ALERT type 4 Improvement, methodology, query or suggestion  
1 ALERT type 5 Informative message, check

It is advisable to attempt to resolve as many as possible of the alerts in all categories. Often the minor alerts point to easily fixed oversights, errors and omissions in your CIF or refinement strategy, so attention to these fine details can be worthwhile. In order to resolve some of the more serious problems it may be necessary to carry out additional measurements or structure refinements. However, the purpose of your study may justify the reported deviations and the more serious of these should normally be commented upon in the discussion or experimental section of a paper or in the "special\_details" fields of the CIF. checkCIF was carefully designed to identify outliers and unusual parameters, but every test has its limitations and alerts that are not important in a particular case may appear. Conversely, the absence of alerts does not guarantee there are no aspects of the results needing attention. It is up to the individual to critically assess their own results and, if necessary, seek expert advice.

#### Publication of your CIF in IUCr journals

A basic structural check has been run on your CIF. These basic checks will be run on all CIFs submitted for publication in IUCr journals (*Acta Crystallographica*, *Journal of Applied Crystallography*, *Journal of Synchrotron Radiation*); however, if you intend to submit to *Acta Crystallographica Section C* or *E* or *IUCrData*, you should make sure that **full publication checks** are run on the final version of your CIF prior to submission.

#### Publication of your CIF in other journals

Please refer to the *Notes for Authors* of the relevant journal for any special instructions relating to CIF submission.

PLATON version of 19/02/2022; check.def file version of 19/02/2022

### Datablock 102 - ellipsoid plot

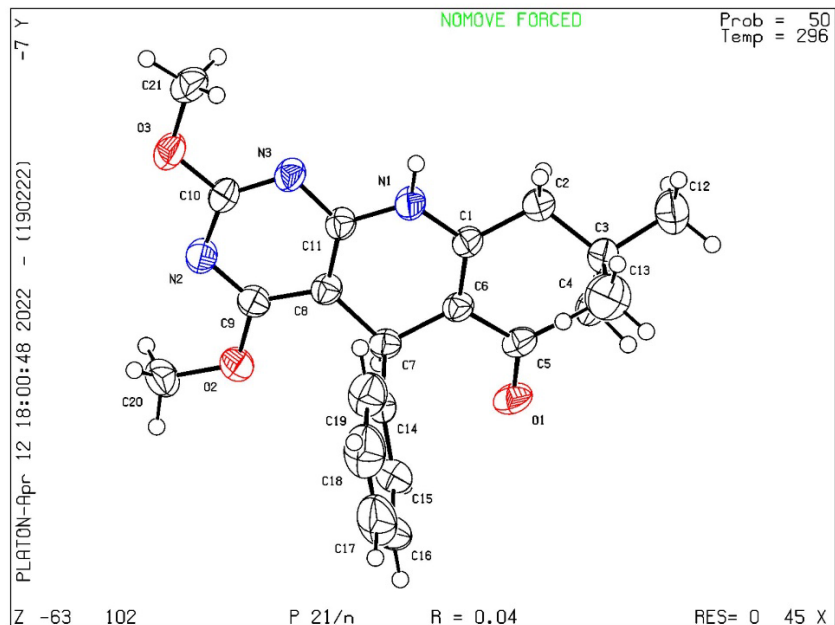

# Crystal X-ray report of compound 4c [CCDC: 2157100].

## checkCIF (basic structural check) running

Checking for embedded fcf data in CIF ...

Found embedded fcf data in CIF. Extracting fcf data from uploaded CIF, please wait . . .

## checkCIF/PLATON (basic structural check)

Structure factors have been supplied for datablock(s) 105

THIS REPORT IS FOR GUIDANCE ONLY. IF USED AS PART OF A REVIEW PROCEDURE FOR PUBLICATION, IT SHOULD NOT REPLACE THE EXPERTISE OF AN EXPERIENCED CRYSTALLOGRAPHIC REFEREE.

No syntax errors found. [CIF dictionary](#)

Please wait while processing .... [Interpreting this report](#)

[Structure factor report](#)

## Datablock: 105

Bond precision: C-C = 0.0028 Å Wavelength=0.71073  
Cell: a=12.5837(13) b=13.0752(17) c=13.0356(16)  
alpha=90 beta=110.844(5) gamma=90  
Temperature: 296 K

|                        | Calculated    | Reported      |
|------------------------|---------------|---------------|
| Volume                 | 2004.4(4)     | 2004.4(4)     |
| Space group            | P 21/n        | P 21/n        |
| Hall group             | -P 2yn        | -P 2yn        |
| Moiety formula         | C22 H25 N3 O4 | ?             |
| Sum formula            | C22 H25 N3 O4 | C22 H25 N3 O4 |
| Mr                     | 395.45        | 395.45        |
| Dx, g cm <sup>-3</sup> | 1.311         | 1.310         |
| Z                      | 4             | 4             |
| Mu (mm <sup>-1</sup> ) | 0.091         | 0.091         |
| F000                   | 840.0         | 840.0         |
| F000'                  | 840.38        |               |
| h,k,lmax               | 14,15,15      | 14,15,15      |
| Nref                   | 3527          | 3528          |
| Tmin,Tmax              | 0.978,0.991   | 0.978,0.991   |
| Tmin'                  | 0.978         |               |

Correction method= # Reported T Limits: Tmin=0.978 Tmax=0.991 AbsCorr =  
MULTI-SCAN  
Data completeness= 1.000 Theta(max)= 24.999  
R(reflections)= 0.0429( 2344) wR2(reflections)= 0.1160( 3528)  
S = 1.029 Npar= 268

The following ALERTS were generated. Each ALERT has the format

[test-name\\_ALERT\\_alert-type\\_alert-level](#).

Click on the hyperlinks for more details of the test.

### Alert level C

PLAT230\_ALERT\_2\_C Hirshfeld Test Diff for C2 --C13 . 5.7 s.u.

PLAT905\_ALERT\_3\_C Negative K value in the Analysis of Variance ... -0.721 Report

### Alert level G

PLAT007\_ALERT\_5\_G Number of Unrefined Donor-H Atoms ..... 1 Report  
PLAT066\_ALERT\_1\_G Predicted and Reported Tmin&Tmax Range Identical ? Check  
PLAT793\_ALERT\_4\_G Model has Chirality at C6 (Centro SPGR) S Verify  
PLAT883\_ALERT\_1\_G No Info/Value for \_atom\_sites\_solution\_primary . Please Do !  
PLAT909\_ALERT\_3\_G Percentage of I>2sig(I) Data at Theta(Max) Still 32% Note  
PLAT941\_ALERT\_3\_G Average HKL Measurement Multiplicity ..... 3.5 Low

PLAT967\_ALERT\_5\_G Note: Two-Theta Cutoff Value in Embedded .res .. 50.0 Degree  
PLAT978\_ALERT\_2\_G Number C-C Bonds with Positive Residual Density. 4 Info

0 ALERT level A = Most likely a serious problem - resolve or explain  
0 ALERT level B = A potentially serious problem, consider carefully  
2 ALERT level C = Check. Ensure it is not caused by an omission or oversight  
8 ALERT level G = General information/check it is not something unexpected

2 ALERT type 1 CIF construction/syntax error, inconsistent or missing data  
2 ALERT type 2 Indicator that the structure model may be wrong or deficient  
3 ALERT type 3 Indicator that the structure quality may be low  
1 ALERT type 4 Improvement, methodology, query or suggestion  
2 ALERT type 5 Informative message, check

It is advisable to attempt to resolve as many as possible of the alerts in all categories. Often the minor alerts point to easily fixed oversights, errors and omissions in your CIF or refinement strategy, so attention to these fine details can be worthwhile. In order to resolve some of the more serious problems it may be necessary to carry out additional measurements or structure refinements. However, the purpose of your study may justify the reported deviations and the more serious of these should normally be commented upon in the discussion or experimental section of a paper or in the "special\_details" fields of the CIF. checkCIF was carefully designed to identify outliers and unusual parameters, but every test has its limitations and alerts that are not important in a particular case may appear. Conversely, the absence of alerts does not guarantee there are no aspects of the results needing attention. It is up to the individual to critically assess their own results and, if necessary, seek expert advice.

#### Publication of your CIF in IUCr journals

A basic structural check has been run on your CIF. These basic checks will be run on all CIFs submitted for publication in IUCr journals (*Acta Crystallographica*, *Journal of Applied Crystallography*, *Journal of Synchrotron Radiation*); however, if you intend to submit to *Acta Crystallographica Section C* or *E* or *IUCrData*, you should make sure that **full publication checks** are run on the final version of your CIF prior to submission.

#### Publication of your CIF in other journals

Please refer to the *Notes for Authors* of the relevant journal for any special instructions relating to CIF submission.

PLATON version of 19/02/2022; check.def file version of 19/02/2022

### Datablock 105 - ellipsoid plot

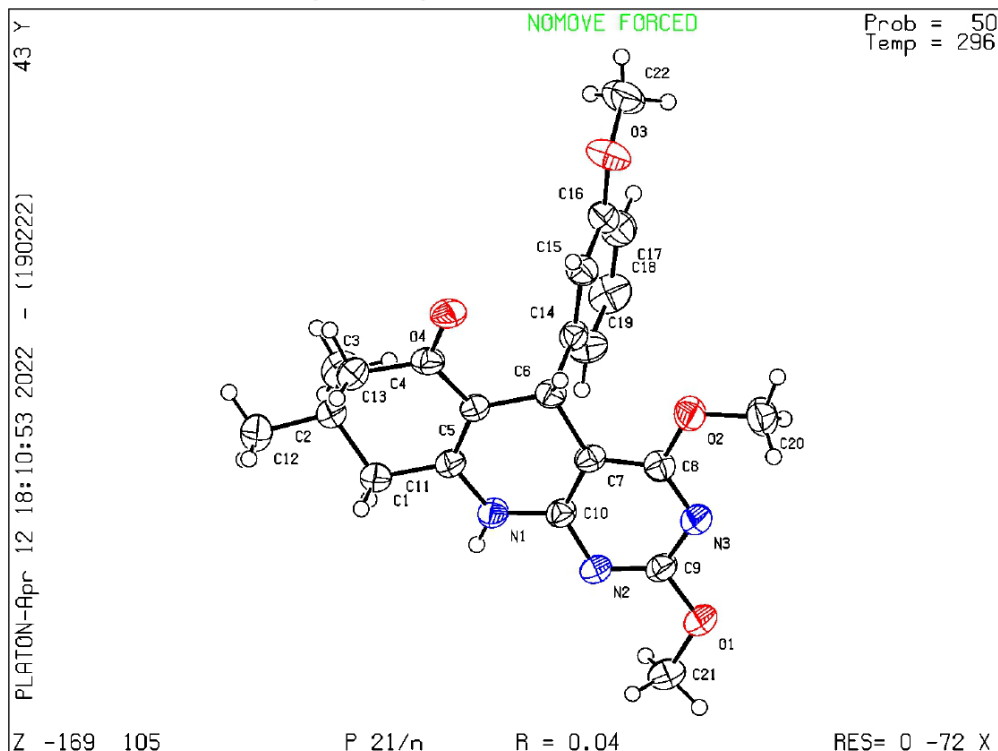

# Crystal X-ray report of compound 4d [CCDC: 2157099].

## checkCIF (basic structural check) running

Checking for embedded fcf data in CIF ...

Found embedded fcf data in CIF. Extracting fcf data from uploaded CIF, please wait . .

## checkCIF/PLATON (basic structural check)

Structure factors have been supplied for datablock(s) 104

THIS REPORT IS FOR GUIDANCE ONLY. IF USED AS PART OF A REVIEW PROCEDURE FOR PUBLICATION, IT SHOULD NOT REPLACE THE EXPERTISE OF AN EXPERIENCED CRYSTALLOGRAPHIC REFEREE.

No syntax errors found. **CIF dictionary**

Please wait while processing .... **Interpreting this report**

**Structure factor report**

## Datablock: 104

Bond precision: C-C = 0.0031 A Wavelength=0.71073  
Cell: a=12.2403(6) b=13.3075(7) c=12.8408(7)  
alpha=90 beta=109.168(2) gamma=90  
Temperature: 296 K

|                | Calculated       | Reported         |
|----------------|------------------|------------------|
| Volume         | 1975.65(18)      | 1975.65(18)      |
| Space group    | P 21/n           | P 21/n           |
| Hall group     | -P 2yn           | -P 2yn           |
| Moiety formula | C21 H22 Cl N3 O3 | ?                |
| Sum formula    | C21 H22 Cl N3 O3 | C21 H22 Cl N3 O3 |
| Mr             | 399.87           | 399.86           |
| Dx, g cm-3     | 1.344            | 1.344            |
| Z              | 4                | 4                |
| Mu (mm-1)      | 0.221            | 0.221            |
| F000           | 840.0            | 840.0            |
| F000'          | 840.93           |                  |
| h,k,lmax       | 14,15,15         | 14,15,15         |
| Nref           | 3473             | 3472             |
| Tmin,Tmax      | 0.969,0.978      | 0.947,0.978      |
| Tmin'          | 0.946            |                  |

Correction method= # Reported T Limits: Tmin=0.947 Tmax=0.978 AbsCorr = MULTI-SCAN

Data completeness= 1.000 Theta(max)= 25.000

R(reflections)= 0.0409( 2579) wR2(reflections)= 0.1089( 3472)

S = 1.015 Npar= 257

The following ALERTS were generated. Each ALERT has the format

**test-name\_ALERT\_alert-type\_alert-level.**

Click on the hyperlinks for more details of the test.

### Alert level G

|                                                                                    |             |
|------------------------------------------------------------------------------------|-------------|
| <a href="#">PLAT007_ALERT_5_G</a> Number of Unrefined Donor-H Atoms .....          | 1 Report    |
| <a href="#">PLAT066_ALERT_1_G</a> Predicted and Reported Tmin&Tmax Range Identical | ? Check     |
| <a href="#">PLAT793_ALERT_4_G</a> Model has Chirality at C7 (Centro SPGR)          | S Verify    |
| <a href="#">PLAT883_ALERT_1_G</a> No Info/Value for _atom_sites_solution_primary . | Please Do ! |
| <a href="#">PLAT909_ALERT_3_G</a> Percentage of I>2sig(I) Data at Theta(Max) Still | 53% Note    |
| <a href="#">PLAT941_ALERT_3_G</a> Average HKL Measurement Multiplicity .....       | 4.0 Low     |
| <a href="#">PLAT967_ALERT_5_G</a> Note: Two-Theta Cutoff Value in Embedded .res .. | 50.0 Degree |
| <a href="#">PLAT978_ALERT_2_G</a> Number C-C Bonds with Positive Residual Density. | 9 Info      |

0 **ALERT level A** = Most likely a serious problem - resolve or explain  
0 **ALERT level B** = A potentially serious problem, consider carefully  
0 **ALERT level C** = Check. Ensure it is not caused by an omission or oversight  
8 **ALERT level G** = General information/check it is not something unexpected

2 ALERT type 1 CIF construction/syntax error, inconsistent or missing data  
1 ALERT type 2 Indicator that the structure model may be wrong or deficient  
2 ALERT type 3 Indicator that the structure quality may be low  
1 ALERT type 4 Improvement, methodology, query or suggestion  
2 ALERT type 5 Informative message, check

It is advisable to attempt to resolve as many as possible of the alerts in all categories. Often the minor alerts point to easily fixed oversights, errors and omissions in your CIF or refinement strategy, so attention to these fine details can be worthwhile. In order to resolve some of the more serious problems it may be necessary to carry out additional measurements or structure refinements. However, the purpose of your study may justify the reported deviations and the more serious of these should normally be commented upon in the discussion or experimental section of a paper or in the "special\_details" fields of the CIF. checkCIF was carefully designed to identify outliers and unusual parameters, but every test has its limitations and alerts that are not important in a particular case may appear. Conversely, the absence of alerts does not guarantee there are no aspects of the results needing attention. It is up to the individual to critically assess their own results and, if necessary, seek expert advice.

#### Publication of your CIF in IUCr journals

A basic structural check has been run on your CIF. These basic checks will be run on all CIFs submitted for publication in IUCr journals (*Acta Crystallographica*, *Journal of Applied Crystallography*, *Journal of Synchrotron Radiation*); however, if you intend to submit to *Acta Crystallographica Section C* or *E* or *IUCrData*, you should make sure that **full publication checks** are run on the final version of your CIF prior to submission.

#### Publication of your CIF in other journals

Please refer to the *Notes for Authors* of the relevant journal for any special instructions relating to CIF submission.

PLATON version of 19/02/2022; check.def file version of 19/02/2022

### Datablock 104 - ellipsoid plot

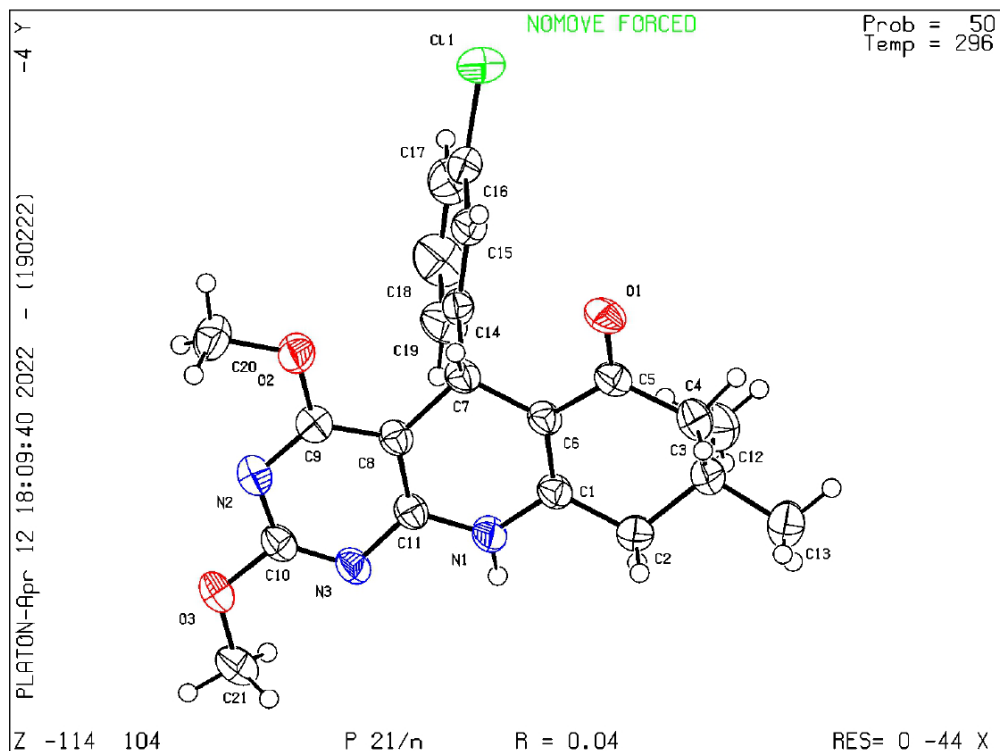

Optimised structure of Molecule 4(a-d) using B3LYP/6-31G(d) basis sets in gaseous state.

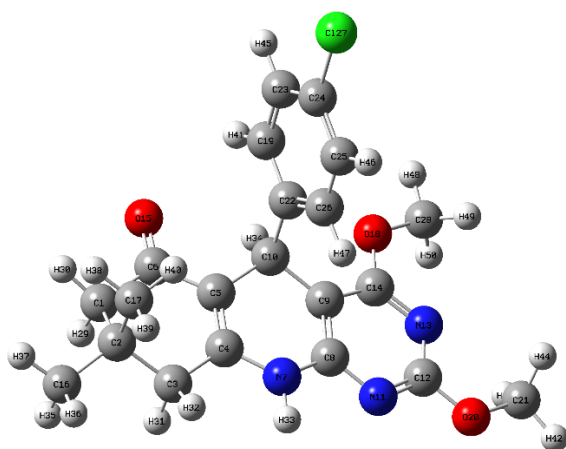

(4a)

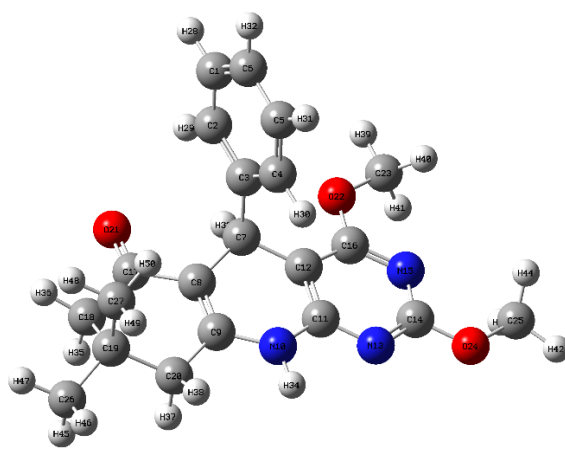

(4b)

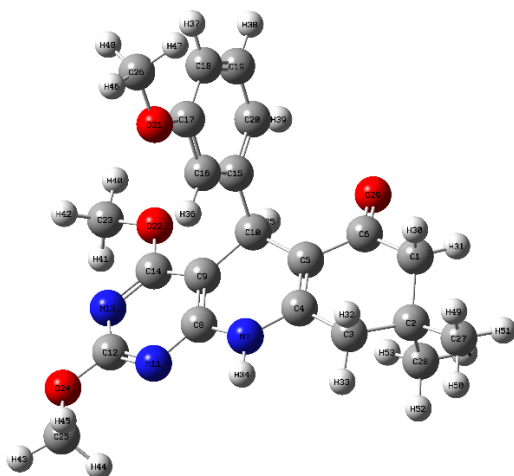

(4c)

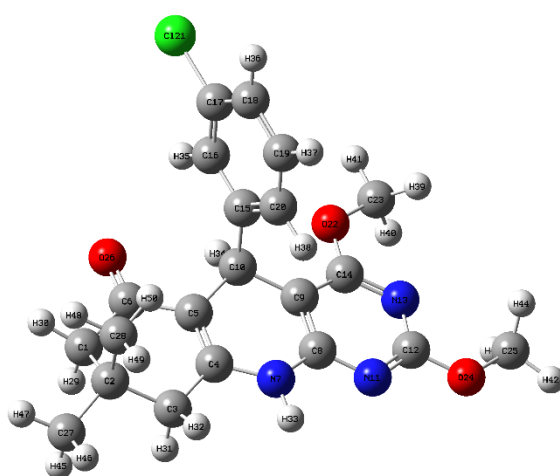

(4d)
